# Supplementary material for: Functional roles for PIEZO1 and PIEZO2 in urothelial mechanotransduction and lower urinary tract interoception
Source: JCI journal article supplement (doi:10.1172/jci.insight.152984), 2021-08-31
Supplement: sd1 [file 1]

You are being redirected.
